# Supplementary material for: Identification of a Glucose Metabolism-related Signature for prediction of Clinical Prognosis in Clear Cell Renal Cell Carcinoma
Source: PubMed Central journal article supplement (PMC7378912; doi:10.7150/jca.45296), 2020-06-21
Supplement: jcav11p4996s1.pdf [file jcav11p4996s1.pdf]

Table S1. Correlation risk score and clinicopathological factors of ccRCC patients in the two sets

| Parameter       | Training set       |                   |            | Validation set     |                   |            |
|-----------------|--------------------|-------------------|------------|--------------------|-------------------|------------|
|                 | High-risk<br>(129) | Low-risk<br>(130) | P<br>value | High-risk<br>(135) | Low-risk<br>(121) | P<br>value |
| Age             |                    |                   | 0.757      |                    |                   | 0.271      |
| ≤60             | 65(50.4%)          | 68(52.3%)         |            | 74(54.8%)          | 58(47.9%)         |            |
| >60             | 64(49.6%)          | 62(47.7%)         |            | 61(45.2%)          | 63(52.1%)         |            |
| Gender          |                    |                   | 0.533      |                    |                   | 0.060      |
| Female          | 39(30.2%)          | 44(33.8%)         |            | 47(34.8%)          | 54(44.6%)         |            |
| Male            | 90(69.8%)          | 86(66.2%)         |            | 88(65.2%)          | 67(55.4%)         |            |
| TNM stage       |                    |                   | <0.001     |                    |                   | 0.001      |
| I               | 51(39.5%)          | 81(62.3%)         |            | 53(39.3%)          | 75(62.0%)         |            |
| II              | 14(10.9%)          | 15(11.5%)         |            | 13(9.6%)           | 13(10.7%)         |            |
| III             | 30(23.3%)          | 23(17.7%)         |            | 40(29.6%)          | 24(19.8%)         |            |
| VI              | 34(26.3%)          | 11(8.5%)          |            | 29(21.5%)          | 9(7.4%)           |            |
| Grade           |                    |                   | 0.001      |                    |                   | 0.024      |
| G1              | 2(1.6%)            | 3(2.3%)           |            | 4(3.0%)            | 7(5.8%)           |            |
| G2              | 50(38.8%)          | 71(54.6%)         |            | 49(36.3%)          | 56(46.3%)         |            |
| G3              | 49(38.0%)          | 49(37.7%)         |            | 54(40.0%)          | 48(39.7%)         |            |
| G4              | 28(21.6%)          | 7(5.4%)           |            | 28(20.7%)          | 10(8.3%)          |            |
| Cluster         |                    |                   | 0.017      |                    |                   | 0.047      |
| 1               | 91(70.5%)          | 110(84.6%)        |            | 91(67.4%)          | 95(78.5%)         |            |
| 2               | 38(29.5%)          | 20(15.4%)         |            | 44(32.6%)          | 26(21.5%)         |            |
| Survival status |                    |                   | <0.001     |                    |                   | <0.001     |
| Alive           | 63(48.8%)          | 109(83.8%)        |            | 81(60.0%)          | 101(83.5%)        |            |
| Dead            | 66(51.7%)          | 21(16.2%)         |            | 54(40.0%)          | 20(16.5%)         |            |

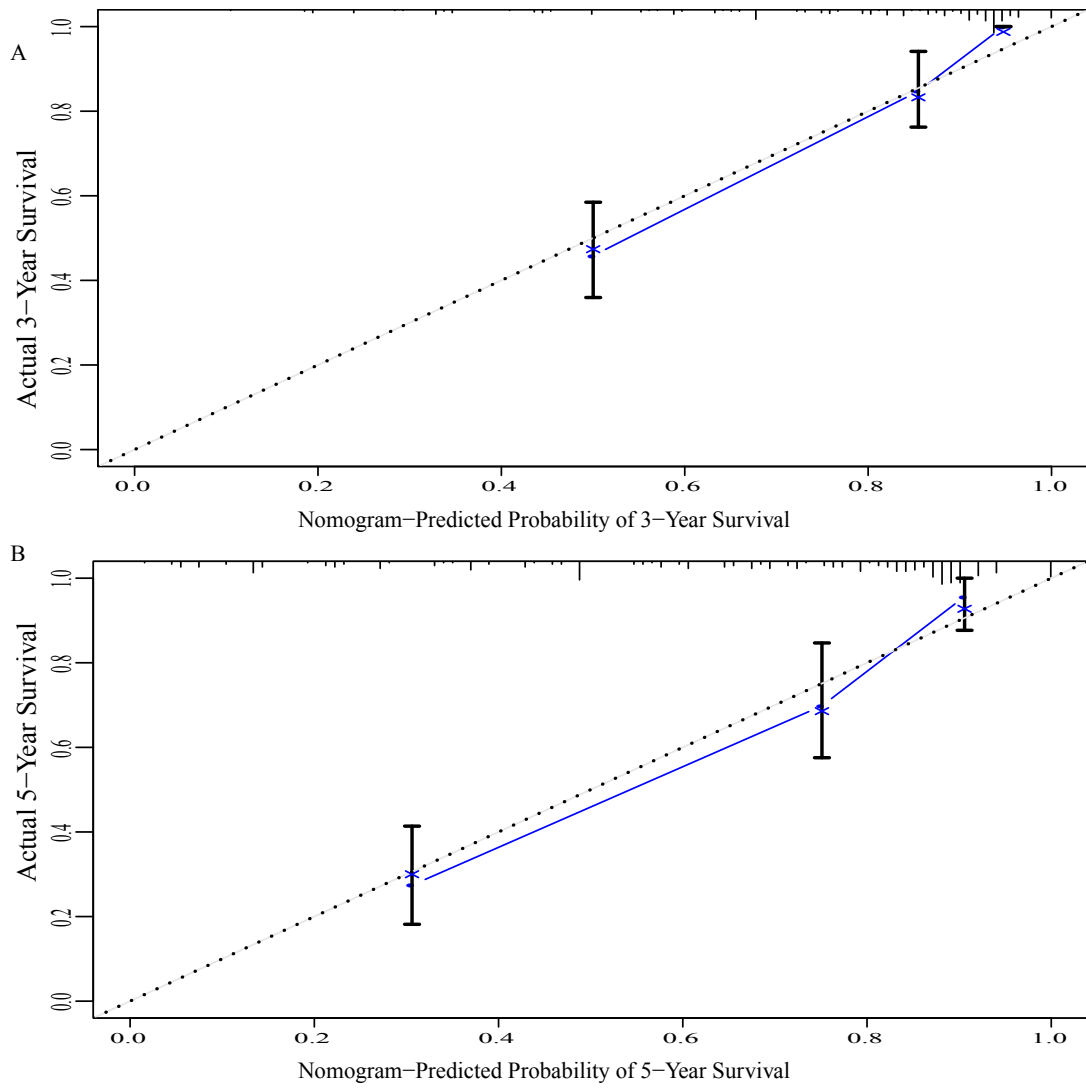

Figure S1. Calibration curve of the nomogram model in validation set. A, for 3- year overall survival. B, for 5- year overall survival.

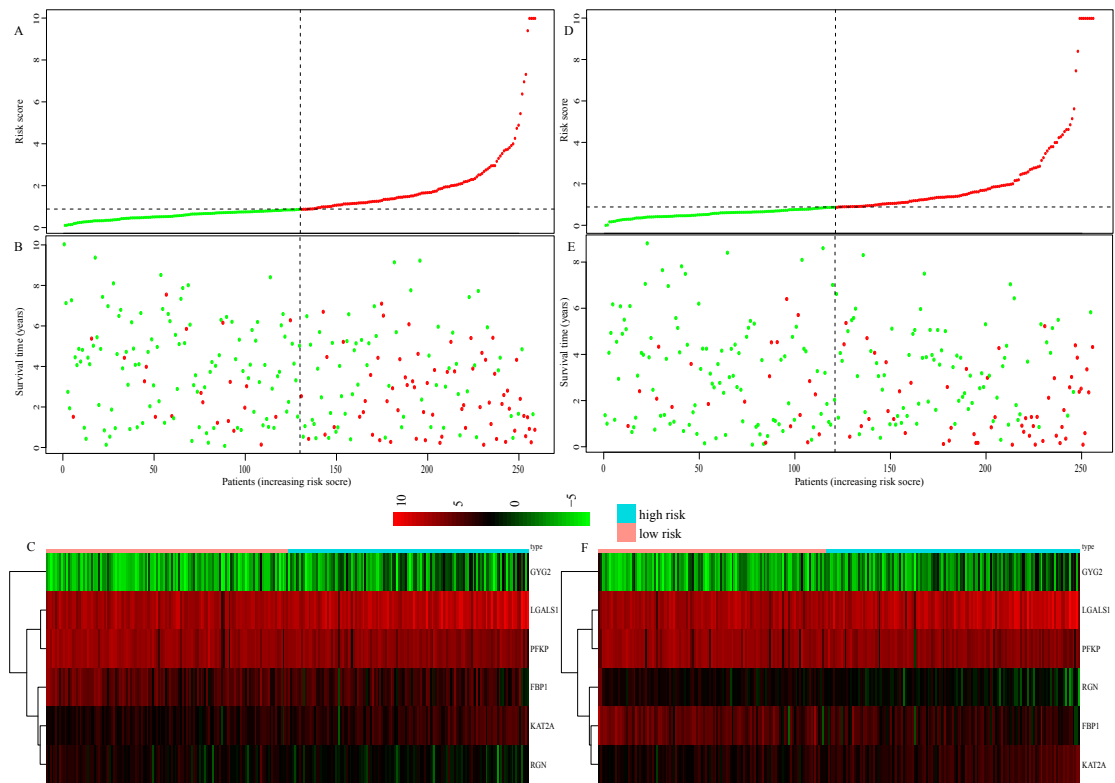

Figure S2. Distribution of risk score, survival status and expression profile of 6 six glucose metabolism-related genes. A B and C, in validation set, D E and F, in validation set.

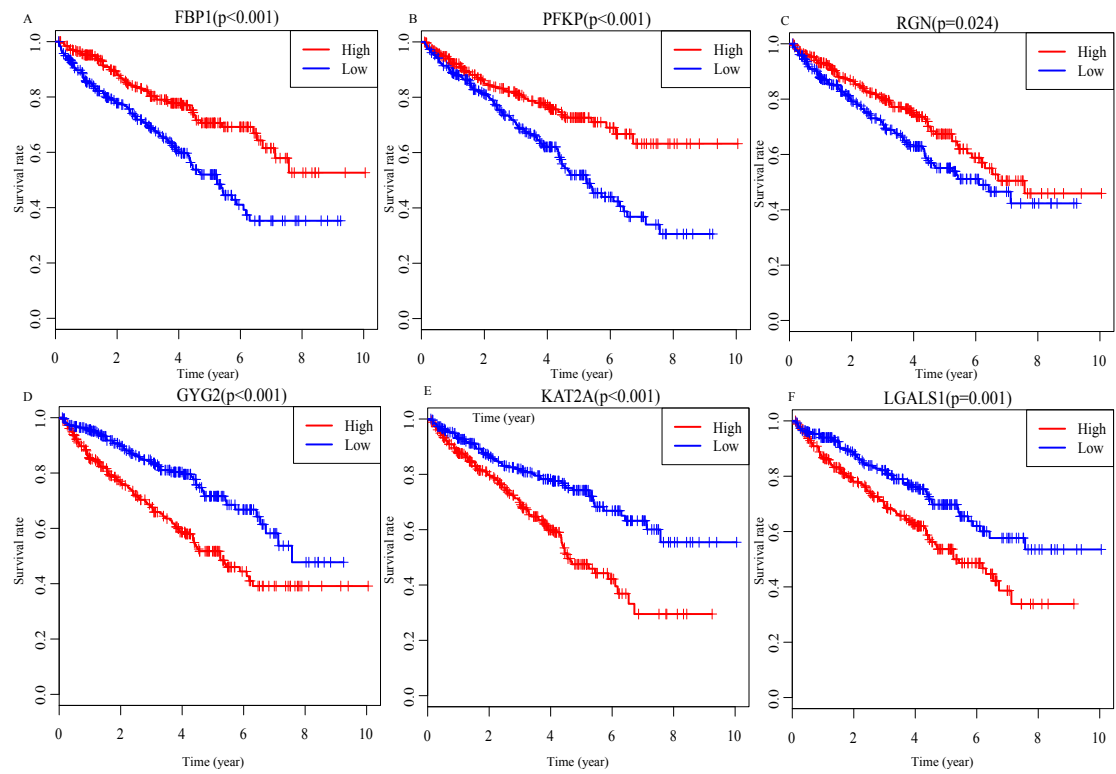

Figure S3. Prognostic values for overall survival. A, FBP1. B, PFKP. C, RGN. D, GYG2. E, KAT2A. F, LGALS1.
